# Supplementary material
Source: publisher site journal article supplement (https://www.spandidos-publications.com/3936/downloadSupplementary)

Figure S1. RT-qPCR verification of transient knockdown and overexpression in PC-3 cells. (A) PC-3 cells were infected with lentivirus carrying sh-NC or sh-LINC01207. Puromycin was used for two weeks to select cells stably expressing the constructs. LINC01207 expression was analyzed by RT-qPCR in the stable cell lines. (B) PC-3 cells were transfected with mimic-NC or miR-1182 mimic. RT-qPCR was performed to quantify the relative expression of miR-1182 48 h post-transfection. (C) PC-3 cells were transfected with inhibitor-NC or miR-1182 inhibitor. RT-qPCR was performed to quantify the relative expression of miR-1182 48 h post-transfection. (D) PC-3 cells were transfected with empty vector or AKT3 expression vector. qPCR was performed to quantify the relative expression of AKT3 48 h post-transfection. n=3. \*P<0.05, \*\*P<0.01, \*\*\*P<0.001; two-tailed, unpaired Student's t-test. LINC01207, long intergenic non-protein coding RNA 1207; miR, microRNA; RT-qPCR, reverse transcription-quantitative PCR; sh, short hairpin RNA; NC, negative control.

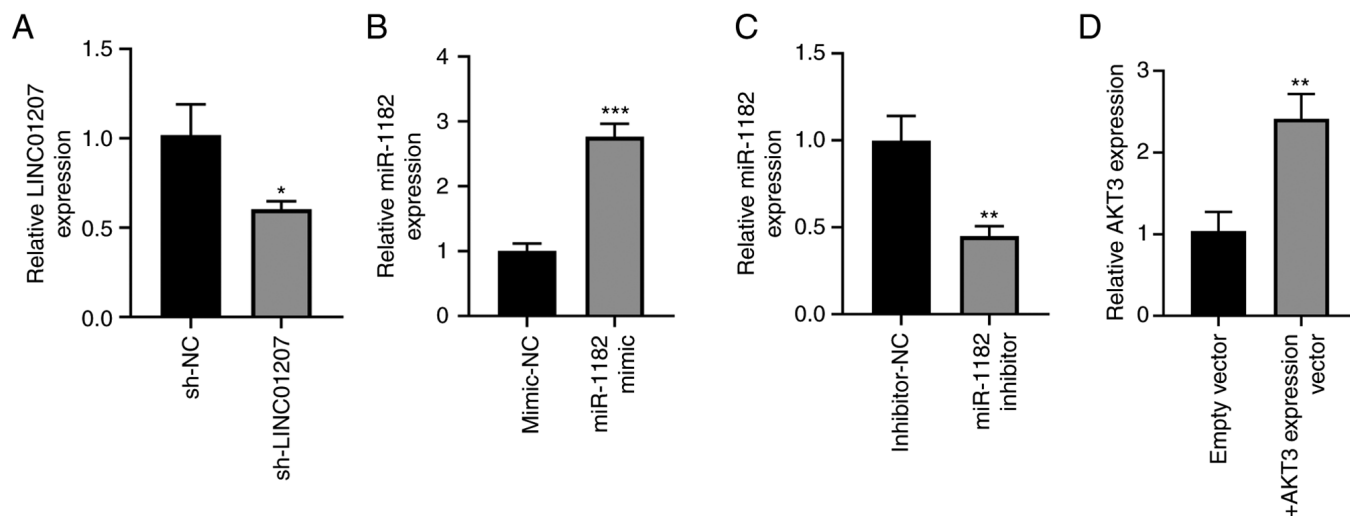

Supplement: Supplementary file 1 [file downloadSupplementary]
